# Supplementary material for: Nobiletin protects against ferroptosis to alleviate sepsis-associated acute liver injury by modulating the gut microbiota
Source: Royal Society of Chemistry journal article supplement (doi:10.1039/d3fo01684f), 2023-01-01
Supplement: d3fo01684f1.pdf [file d3fo01684f1.pdf]

# 1 **Supporting Information for ORIGINAL ARTICLE**

2

## 3 **Supplementary materials and methods**

### 4 **Quantitative analysis of NOB**

5 The levels of NOB in mice feces were quantitated by a liquid chromatography-  
6 tandem mass spectrometry system (LC-MS/MS). The feces were added 9-fold  
7 w/v of ultrapure water followed by ultrasonic extraction for 10 min. Next, the  
8 supernatant was harvested after centrifuging at 13,000 rpm and 4°C for 10 min  
9 after adding methanol. The supernatant was then dried under nitrogen, and  
10 then resuspension in 100 mL methanol and centrifugation for 10 min at 13,000  
11 rpm and 4°C. Chromatographic separation of samples was conducted on a TSQ  
12 Vantage triple quadrupole mass spectrometer and Prelude SPLC system  
13 (Thermo Fisher Scientific, USA). The mobile phase was isocratic elution, with  
14 the solvent compositions A solution being 5 mM ammonium acetate and 0.1%  
15 [v/v] formic acid, and B solution being methanol. For the column, a temperature  
16 of 40°C was established. TraceFinder software (version 3.3 sp1, Thermo Fisher  
17 Scientific, USA) was employed for data acquisition and analysis.

18

## 19 **Supplementary tables and figures**

### 20 **Table S1. Primers for qPCR**

|               | Left primer (5'-3')     | Right primer (5'-3')    |
|---------------|-------------------------|-------------------------|
| TNF- $\alpha$ | CCACCACGCTCTTCTGTCTAC   | AGGGTCTGGGCCATAGAACT    |
| IL-1 $\beta$  | GGTCAAAGGTTTGGAAGCAG    | TGTGAAATGCCACCTTTTGA    |
| IL-6          | TGATGCACTTGCAGAAAACA    | ACCAGAGGAAATTTTCAATAGGC |
| GAPDH         | TGACCTCAACTACATGGTCTACA | CTTCCCATTCTCGGCCTTG     |

21

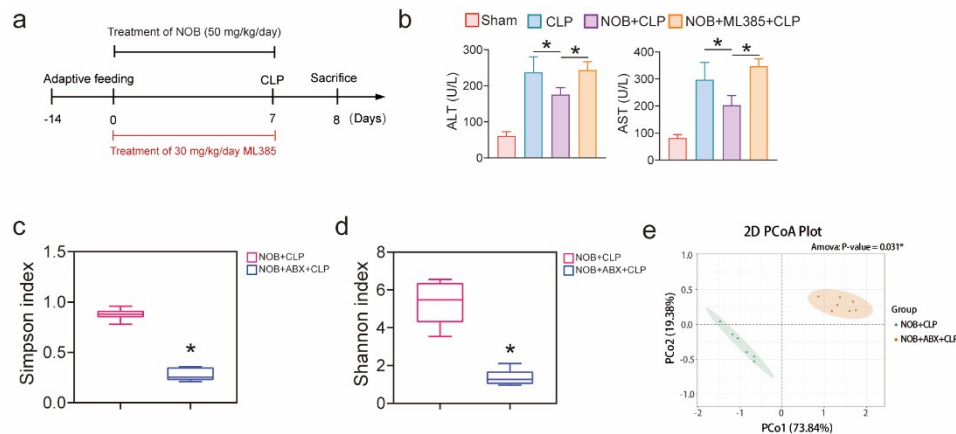

22

23

24 **Figure S1** (a) Experimental design and timeline for effects of NOB and ML385  
 25 on SALI. (b) Relative plasma ALT and AST levels (n=4). (c-d) The Alpha  
 26 diversity indices were accessed by Simpson and Shannon in gut microbiomes.  
 27 (n = 6). (e) The  $\beta$ -diversity of intestinal bacteria showed by the weighted unifracs  
 28 principal coordinates analysis (PCoA). (n = 6). \*P < 0.05.

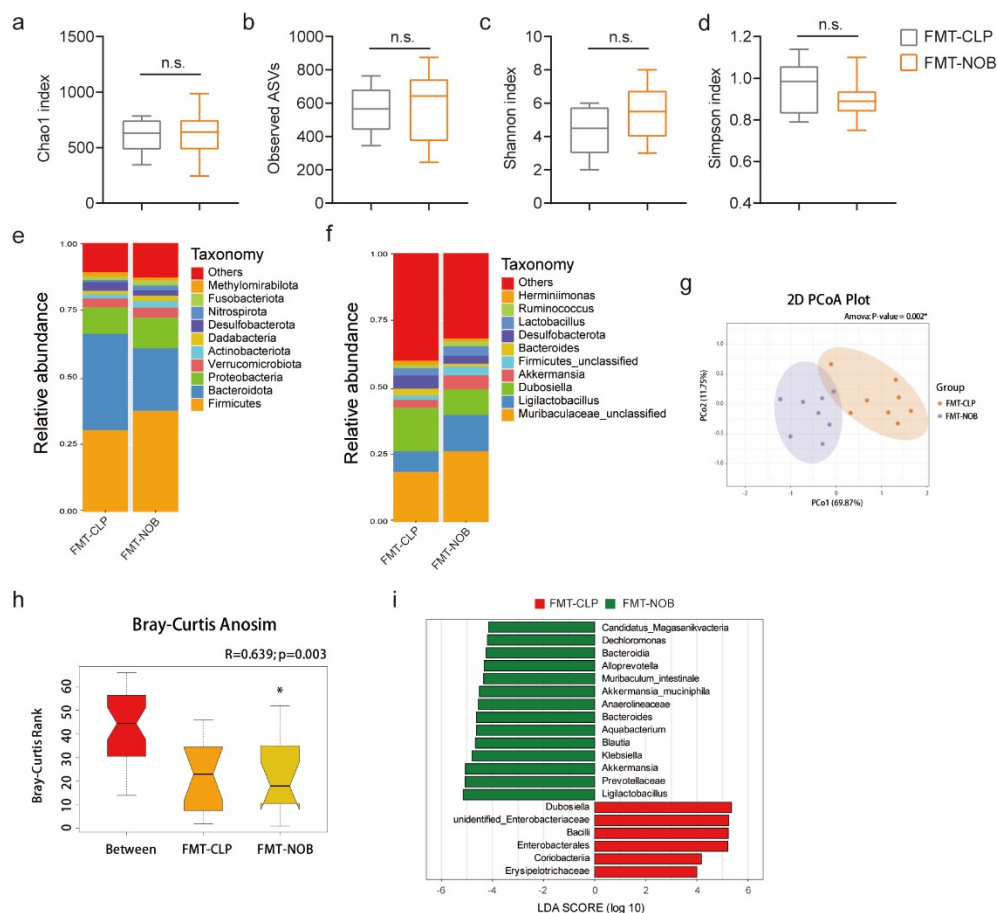

29

30 **Fig. S2** Gut microbiota structure in FMT-treated mice. (a-d) Alpha diversity  
 31 indices were accessed by Chao 1, observed OTUs, Shannon, and Simpson in

32 gut microbiomes. (e-f) Relative abundance of the gut bacteria at the phylum  
 33 and genus level in each group. (g) The  $\beta$ -diversity of intestinal bacteria showed  
 34 by the weighted uniFrac principal coordinates analysis (PCoA). (h) Anosim  
 35 analysis on weighted UniFrac distances in feces. (i) Histogram of linear  
 36 discriminant analysis (LDA) represented the enriched bacteria between the  
 37 FMT-CLP and FMT-NOB groups,  $n=8$ . Data are expressed as the mean $\pm$ SEM.  
 38 \* $P<0.05$ , and n.s. indicates nonsignificant.

39

40

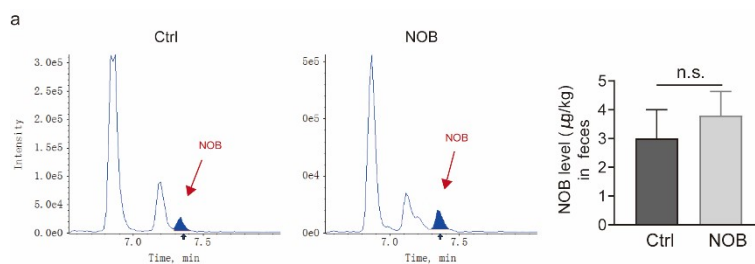

41 **Fig.S3** NOB levels in feces from mice treated with or without NOB for 7 days  
 42 by targeted liquid chromatography-tandem mass spectrometry analysis (LC-  
 43 MS/MS).  $n=5$ . Data are expressed as the mean $\pm$ SEM. The n.s. indicates  
 44 nonsignificant.

45

46
